# Supplementary material for: Elevated long noncoding RNA MALAT-1 expression is predictive of poor prognosis in patients with breast cancer: a meta-analysis
Source: PubMed Central journal article supplement (PMC7419804; doi:10.1042/bsr20200215), 2020-08-11
Supplement: BSR-2020-0215_supp.pdf [file BSR-2020-0215_supp.pdf]

**A****TCGA**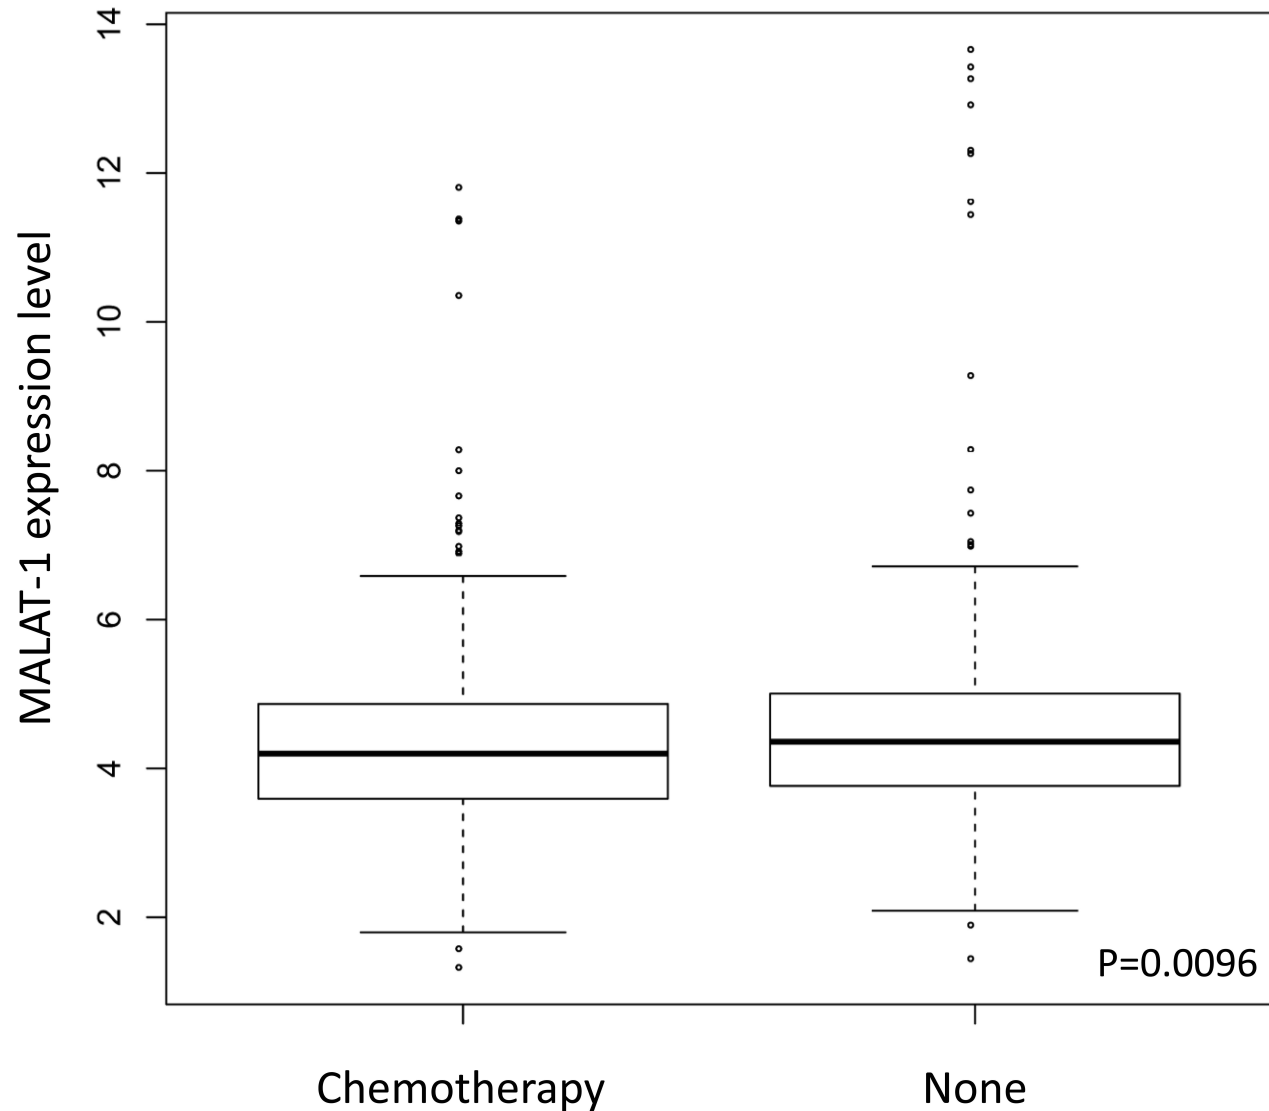**B****GSE19615**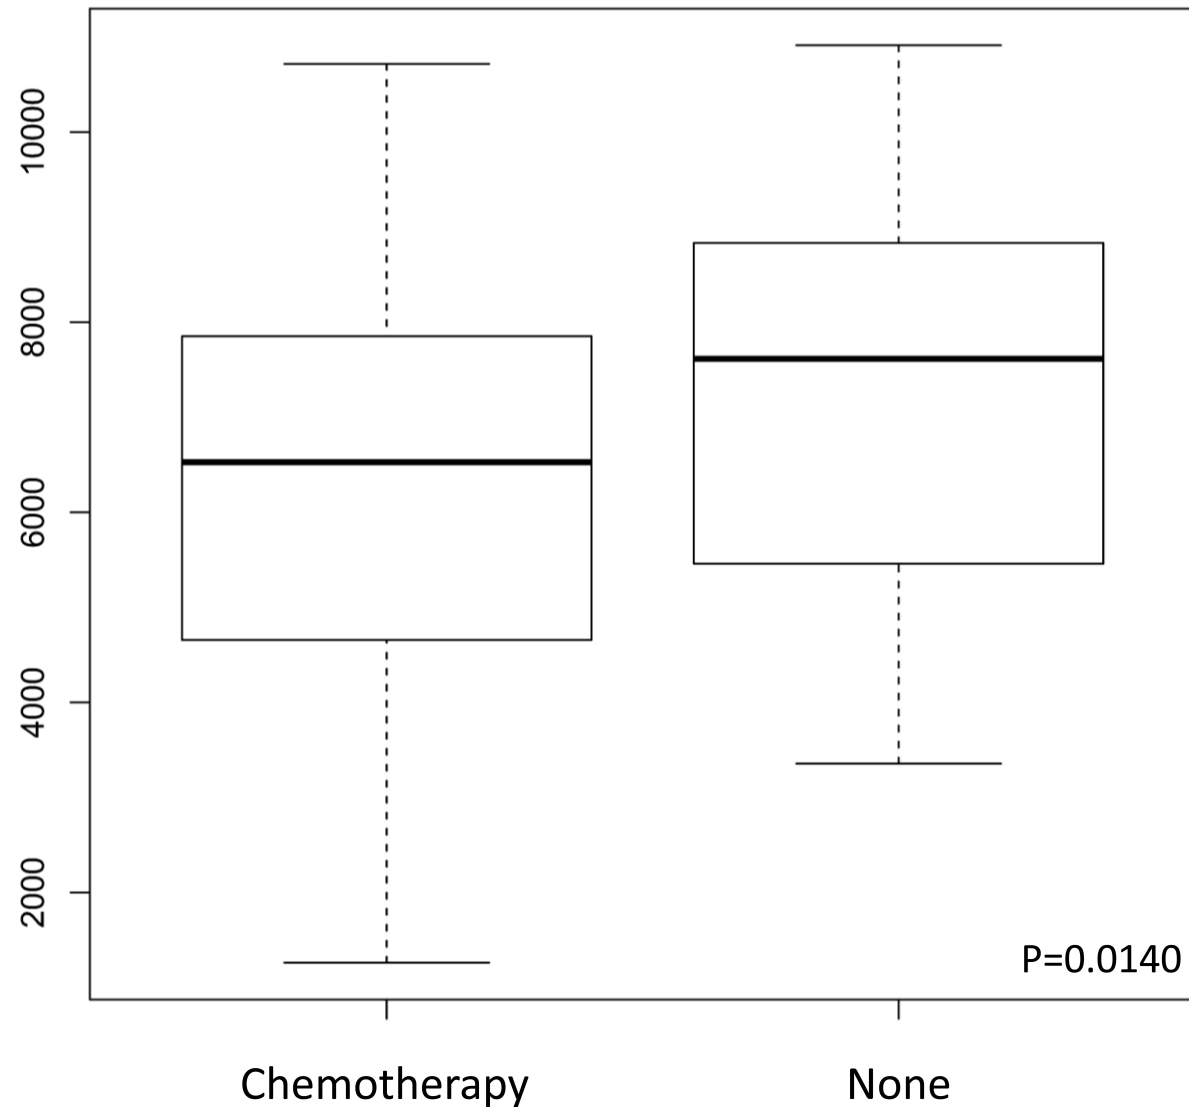

**Figure. S1.** Box-plot data depicting the relative levels of MALAT-1 in breast cancer patient samples from public microarray datasets: (A) TCGA microarray dataset; (B) GSE19165 dataset from GEO
